# Supplementary material for: Coexistence of strongly buckled germanene phases on Al(111)
Source: publisher site journal article supplement (doi:10.3762/bjnano.8.195), 2017-09-18
Supplement: Additional file 1 [file 2190-4286-8-195-S1.pdf]

# Supporting Information

for

## Coexistence of strongly buckled germanene phases on Al(111)

Weimin Wang\* and Roger I. G. Uhrberg

Address: Department of Physics, Chemistry, and Biology, Linköping University,  
S-581 83 Linköping, Sweden

Email: Weimin Wang - weiwa49@ifm.liu.se

\* Corresponding author

### Detailed information of the (3×3) and ( $\sqrt{7}\times\sqrt{7}$ ) models

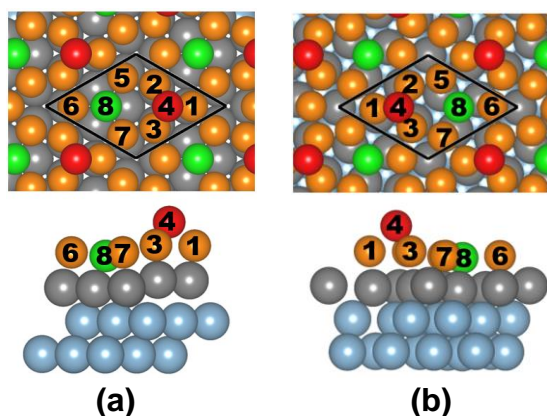

**Figure S1:** (a) Top and side views of the relaxed model of (2×2) germanene on (3×3) Al(111). The black cell represents a (3×3) reconstruction with respect to the Al(111) surface. (b) Top and side views of the relaxed model of (2×2) germanene on ( $\sqrt{7}\times\sqrt{7}$ ) Al(111). The black cell represents a ( $\sqrt{7}\times\sqrt{7}$ ) reconstruction with respect to the Al(111) surface.

In the  $3\times 3$  model, the bond lengths and angles between Ge(4) and Ge(1-3) are  $\sim 2.56$  Å and  $\sim 81.0^\circ$ , respectively; the bond lengths and angles between Ge(8) and Ge(5-7) are  $\sim 2.52$  Å and  $\sim 118.5^\circ$ , respectively; The adsorption energy is  $-0.45$  eV/Ge atom.

In the  $\sqrt{7}\times\sqrt{7}$  model, the bond lengths and angles between Ge(4) and Ge(1-3) are  $\sim 2.55$  Å and  $\sim 78.0^\circ$ , respectively; the bond lengths and angles between Ge(8) and Ge(5-7) are  $\sim 2.55$  Å and  $\sim 120.0^\circ$ , respectively; The adsorption energy is  $-0.46$  eV/Ge atom.

The charge transfer is calculated by the Bader scheme within VASP.

The germanene layer gains totally 1.80 and 2.32 electrons in the  $3\times 3$  and  $\sqrt{7}\times\sqrt{7}$  models, respectively, from Al atoms. In the  $3\times 3$  model, Ge(8) gains 0.40 electron; Ge(5-7) gain 0.33-0.34 electron/atom; Ge(1-3) gain 0.18-0.19 electron/atom; Ge(4) loses 0.15 electron. The charge transfer calculation of the  $\sqrt{7}\times\sqrt{7}$  model: Ge(5-7) gain 0.38-0.41 electron/atom; Ge(1-3,8) gain 0.31-0.32 electron/atom; Ge(4) loses 0.14 electron.

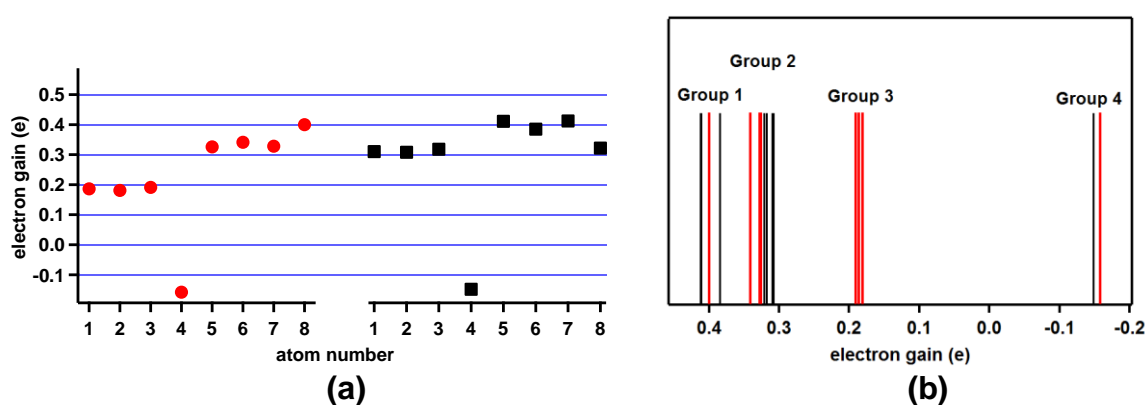

**Figure S2:** (a) Charge transfer diagram for different Ge atoms of the  $3\times 3$  (red dots) and the  $\sqrt{7}\times\sqrt{7}$  (black squares) models in Figure S1. (b) The grouping is based on the quantity of electron gain. The red and black bars correspond to the  $3\times 3$  and the  $\sqrt{7}\times\sqrt{7}$  models respectively. Note that there is no Ge atom of the  $\sqrt{7}\times\sqrt{7}$  model with a charge similar to the group 3 atoms of the  $3\times 3$  model.
